# Supplementary material for: Direct and Label-Free Monitoring of Albumin in 2D Fatty Liver Disease Model Using Plasmonic Nanogratings
Source: PubMed Central journal article supplement (PMC7765559; doi:10.3390/nano10122520), 2020-12-15
Supplement: nanomaterials-10-02520-s001.pdf [file nanomaterials-10-02520-s001.pdf]

# Direct and Label-Free Monitoring of Albumin in 2D Fatty Liver Disease Model Using Plasmonic Nanogratings

Gerardo A. Lopez-Muñoz <sup>1</sup>, Ma. Alejandra Ortega <sup>1</sup>, Ainhoa Ferret-Miñana <sup>1</sup>, Francesco De Chiara <sup>1</sup> and Javier Ramón-Azcón <sup>1,2,\*</sup>

<sup>1</sup> Institute for Bioengineering of Catalonia (IBEC), The Barcelona Institute of Science and Technology, Baldiri I Reixac, 10-12, 08028 Barcelona, Spain; glopez@ibecbarcelona.eu (G.A.L.-M.); mortega@ibecbarcelona.eu (M.A.O.); aferret@ibecbarcelona.eu (A.F.-M.); fdechiara@ibecbarcelona.eu (F.D.C.)

<sup>2</sup> ICREA-Institució Catalana de Recerca i Estudis Avançats, 08010 Barcelona, Spain

\* Correspondence: jramon@ibecbarcelona.eu; Tel.: +34-934-039-735

## Supporting Information

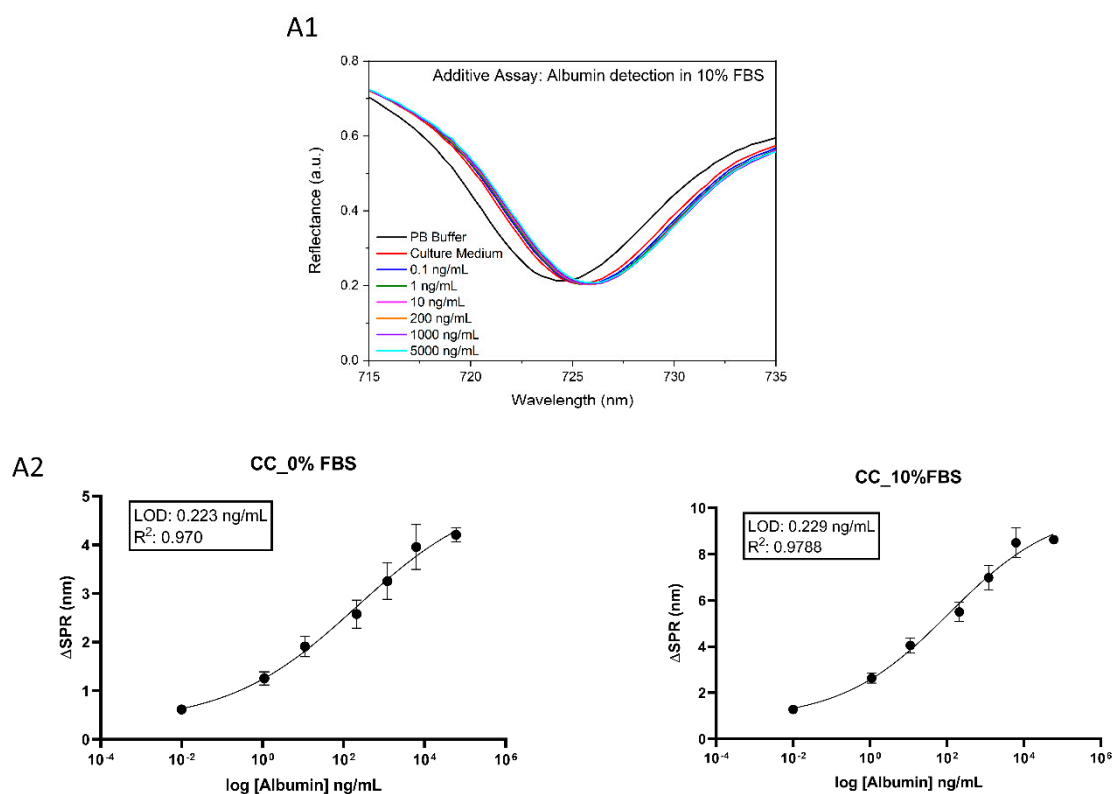

Figure S1
